# Supplementary material for: Differential effects of sex on tuberculosis location and severity across the lifespan
Source: PubMed Central journal article supplement (PMC10102118; doi:10.1038/s41598-023-33245-5), 2023-04-13
Supplement: 41598_2023_33245_MOESM1_ESM.pdf [file 41598_2023_33245_MOESM1_ESM.pdf]

# Differential effects of sex on tuberculosis location and severity across the lifespan

## Author

Jinsoo Min<sup>1,12</sup>, Jae Seuk Park<sup>2,12</sup>, Hyung Woo Kim<sup>3</sup>, Yousang Ko<sup>4</sup>, Jee Youn Oh<sup>5</sup>, Yun-Jeong Jeong<sup>6</sup>, Ju Ock Na<sup>7</sup>, Sun-Jung Kwon<sup>8</sup>, Kang Hyeon Choe<sup>9</sup>, Won-Yeon Lee<sup>10</sup>, Sung-Soon Lee<sup>11</sup>, Ju Sang Kim<sup>3,13</sup>, and Hyeon-Kyoung Koo<sup>11,13</sup>

## Affiliation

<sup>1</sup> Division of Pulmonary and Critical Care Medicine, Department of Internal Medicine, Seoul St. Mary's Hospital, College of Medicine, The Catholic University of Korea, Seoul, Republic of Korea

<sup>2</sup> Division of Pulmonary Medicine, Department of Internal Medicine, Dankook University College of Medicine, Cheonan, Republic of Korea

<sup>3</sup> Division of Pulmonary and Critical Care Medicine, Department of Internal Medicine, Incheon St. Mary's Hospital, College of Medicine, The Catholic University of Korea, Seoul, Republic of Korea

<sup>4</sup> Division of Pulmonary, Allergy and Critical Care Medicine, Department of Internal Medicine, Kangdong Sacred Heart Hospital, Hallym University College of Medicine, Seoul, Republic of Korea

<sup>5</sup> Division of Pulmonary, Allergy, and Critical Care Medicine, Department of Internal Medicine, Korea University Guro Hospital, Korea University College of Medicine, Seoul, Republic of Korea

<sup>6</sup> Division of Pulmonary and Critical Care Medicine, Department of Internal Medicine, Dongguk University Ilsan Hospital, Dongguk University College of Medicine, Goyang, Republic of Korea

<sup>7</sup> Department of Internal Medicine, Soonchunhyang University Cheonan Hospital, Cheonan, Republic of Korea

<sup>8</sup> Department of Internal Medicine, College of Medicine, Konyang University, Daejeon, Republic of Korea

<sup>9</sup> Division of Pulmonary and Critical Care Medicine, Department of Internal Medicine, Chungbuk National University College of Medicine, Cheongju, Republic of Korea.

<sup>10</sup> Division of Pulmonary, Allergy, and Critical Care Medicine, Department of Internal Medicine, Yonsei University Wonju Severance Christian Hospital, Yonsei University Wonju College of Medicine, Wonju, Republic of Korea

<sup>11</sup> Division of Pulmonary and Critical Care Medicine, Department of Internal Medicine, Ilsan Paik Hospital, Inje University College of Medicine, Goyang, Republic of Korea

## Supplements

**Supplemental Table 1.** Association of age and sex with disease severities of pulmonary tuberculosis, interaction between age and sex, and main effect of age stratified by sex

|                      | Age                 | Sex                 | Age*Sex |         | Male (age)          | Female (age)        |
|----------------------|---------------------|---------------------|---------|---------|---------------------|---------------------|
|                      | OR (95% CI)         | OR (95% CI)         | Coef    | P-value | OR (95% CI)         | OR (95% CI)         |
| Symptom presence     | 1.013 (1.009-1.017) | 1.079 (0.934-1.247) | 0.003   | 0.423   | 1.011 (1.006-1.016) | 1.014 (1.008-1.020) |
| Cavitary disease     | 0.985 (0.980-0.989) | 0.661 (0.544-0.803) | -0.001  | 0.754   | 0.985 (0.979-0.991) | 0.986 (0.978-0.993) |
| Bilateral disease    | 1.013 (1.009-1.017) | 0.876 (0.752-1.020) | 0.007   | 0.083   | 1.011 (1.005-1.017) | 1.014 (1.008-1.021) |
| AFB smear positivity | 1.009 (1.005-1.013) | 0.853 (0.723-1.005) | 0.004   | 0.277   | 1.007 (1.001-1.013) | 1.009 (1.002-1.016) |

OR, odds ratio; CI, confidence interval; Coef, coefficient; AFB, acid-fast bacilli.

The multivariable model was adjusted for age, sex, body mass index, current smoking status, heavy alcohol intake, and the presence of comorbidities.

**Supplemental Table 2.** Effect of female sex compared to male sex on disease severity of interest in pulmonary tuberculosis: (A) symptom presence, (B) cavitory disease, (C) bilateral disease, and (D) AFB smear positivity

(A) Presence of symptoms

| Age categories, years | Univariable analysis |             | Multivariable analysis |             |
|-----------------------|----------------------|-------------|------------------------|-------------|
|                       | cOR                  | 95% CI      | aOR                    | 95% CI      |
| ≤19                   | 1.949                | 1.010-3.761 | 1.906                  | 0.883-4.114 |
| 20-29                 | 0.951                | 0.587-1.541 | 1.208                  | 0.673-2.168 |
| 30-39                 | 0.763                | 0.503-1.157 | 0.718                  | 0.424-1.217 |
| 40-49                 | 0.630                | 0.427-0.931 | 0.707                  | 0.441-1.134 |
| 50-59                 | 0.867                | 0.634-1.186 | 0.814                  | 0.569-1.163 |
| 60-69                 | 1.209                | 0.854-1.713 | 1.331                  | 0.893-1.985 |
| 70-79                 | 1.071                | 0.820-1.399 | 1.119                  | 0.826-1.517 |
| 80-99                 | 0.991                | 0.703-1.397 | 1.026                  | 0.708-1.487 |

(B) Cavitory disease.

| Age categories, years | Univariable |             | Multivariable |             |
|-----------------------|-------------|-------------|---------------|-------------|
|                       | cOR         | 95% CI      | aOR           | 95% CI      |
| ≤19                   | 1.102       | 0.501-2.422 | 2.288         | 0.833-6.283 |
| 20-29                 | 0.981       | 0.563-1.710 | 1.299         | 0.670-2.519 |
| 30-39                 | 0.457       | 0.264-0.790 | 0.614         | 0.309-1.220 |
| 40-49                 | 0.373       | 0.219-0.636 | 0.599         | 0.323-1.109 |
| 50-59                 | 0.355       | 0.231-0.546 | 0.440         | 0.275-0.704 |
| 60-69                 | 0.468       | 0.290-0.756 | 0.584         | 0.336-1.014 |

|       |       |             |       |             |
|-------|-------|-------------|-------|-------------|
| 70-79 | 0.866 | 0.572-1.311 | 1.124 | 0.697-1.813 |
| 80-99 | 0.685 | 0.414-1.135 | 0.748 | 0.433-1.290 |

(C) Bilateral disease

| Age categories, years | Univariable analysis |             | Multivariable analysis |             |
|-----------------------|----------------------|-------------|------------------------|-------------|
|                       | cOR                  | 95% CI      | aOR                    | 95% CI      |
| ≤19                   | 0.638                | 0.281-1.445 | 0.530                  | 0.210-1.339 |
| 20-29                 | 0.974                | 0.520-1.827 | 0.844                  | 0.394-1.809 |
| 30-39                 | 0.807                | 0.497-1.312 | 0.940                  | 0.461-1.529 |
| 40-49                 | 0.540                | 0.339-0.860 | 0.624                  | 0.361-1.081 |
| 50-59                 | 0.640                | 0.445-0.922 | 0.855                  | 0.569-1.285 |
| 60-69                 | 0.730                | 0.496-1.073 | 0.750                  | 0.489-1.150 |
| 70-79                 | 0.748                | 0.573-0.977 | 0.856                  | 0.636-1.152 |
| 80-99                 | 0.981                | 0.717-1.341 | 1.092                  | 0.780-1.529 |

(D) AFB smear positivity

| Age categories, years | Univariable analysis |             | Multivariable analysis |             |
|-----------------------|----------------------|-------------|------------------------|-------------|
|                       | cOR                  | 95% CI      | aOR                    | 95% CI      |
| ≤19                   | 1.485                | 0.632-3.487 | 1.747                  | 0.645-4.735 |
| 20-29                 | 0.970                | 0.520-1.818 | 0.806                  | 0.389-1.667 |
| 30-39                 | 0.575                | 0.324-1.021 | 0.696                  | 0.327-1.481 |
| 40-49                 | 0.650                | 0.401-1.054 | 0.840                  | 0.452-1.561 |
| 50-59                 | 0.509                | 0.338-0.765 | 0.517                  | 0.327-0.816 |
| 60-69                 | 0.644                | 0.421-0.984 | 0.727                  | 0.452-1.170 |

|       |       |             |       |             |
|-------|-------|-------------|-------|-------------|
| 70-79 | 0.961 | 0.717-1.287 | 1.095 | 0.792-1.515 |
| 80-99 | 1.018 | 0.731-1.416 | 0.970 | 0.680-1.384 |

cOR, crude odds ratio; CI, confidence interval; aOR, adjusted odds ratio; AFB, acid-fast bacilli.

The multivariable model was adjusted for age, sex, body mass index, current smoking status, heavy alcohol intake, and the presence of comorbidities.

**Supplemental Figure 1.** Changes in the proportions of sex in 10-year age increments for (A) TB pleurisy, (B) TB lymphadenopathy, (C) intestinal TB, (D) bone/joint TB, (E) central nervous system TB, and (F) genitourinary TB.

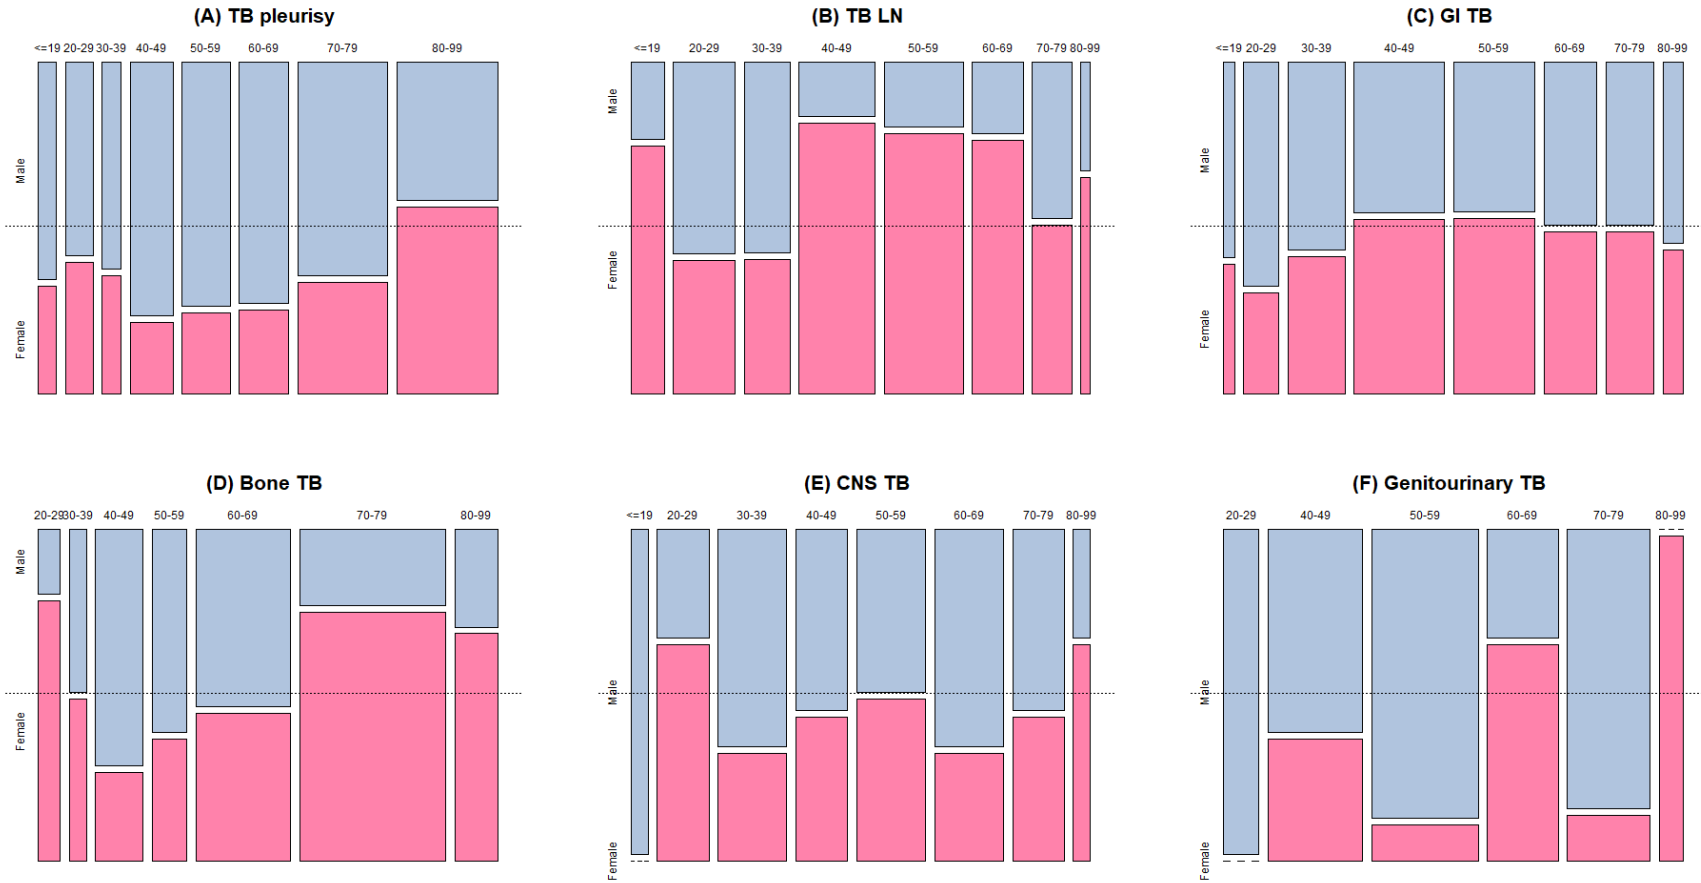

TB, tuberculosis

Areas of each box reflect relative number of patients in each group.

**Supplemental Figure 2.** Changes in proportions of sex in 10-year age increments among patients with pulmonary tuberculosis for each disease severity of interest: (A) symptom presence, (B) cavitory disease, (C) bilateral disease, and (D) AFB smear positivity

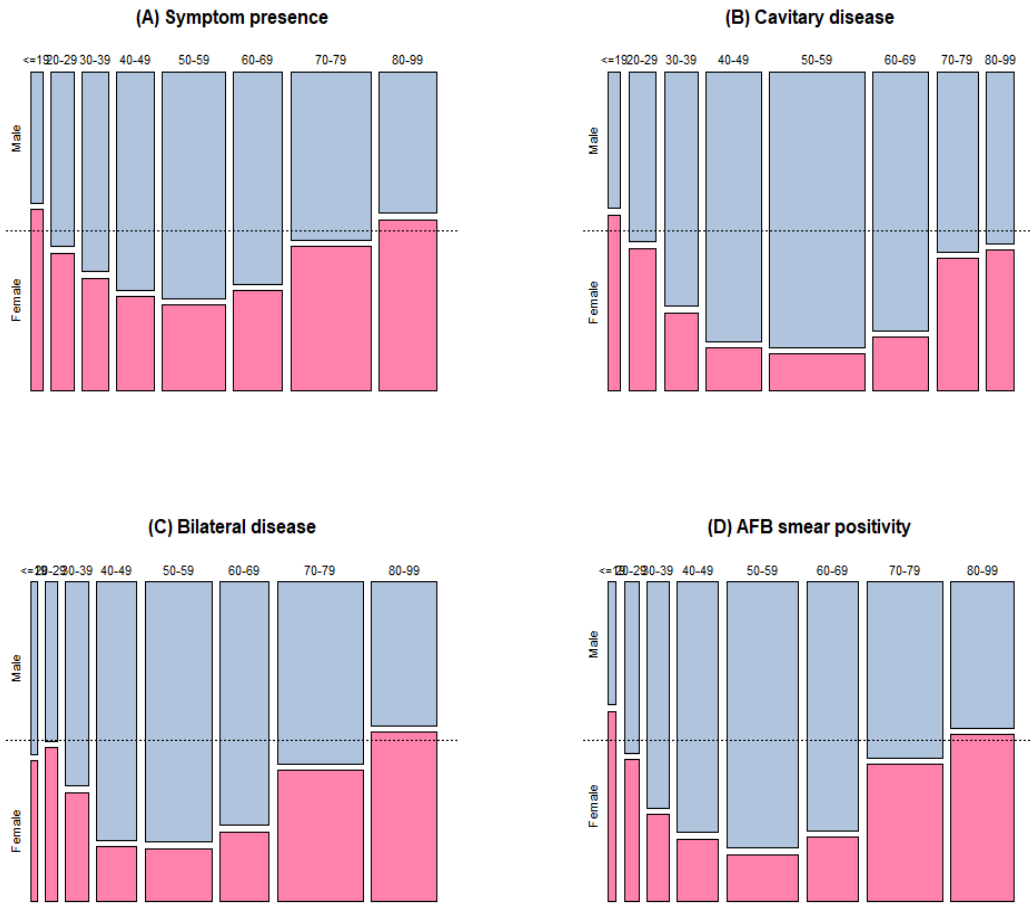

AFB, acid-fast bacilli

Areas of each box reflect relative number of patients in each group.
